# Supplementary material for: Comprehensive Comparative Analyses of Aspidistra Chloroplast Genomes: Insights into Interspecific Plastid Diversity and Phylogeny
Source: MDPI journal article supplement (doi:10.3390/genes14101894), 2023-09-29
Supplement: s1 [file s1]

**Table S1. Information of the seven newly sequenced *Aspidistra* taxa in this study.**

| Species                           | Collector                    | Collection places                                                                    | Coverage<br>depth | Voucher<br>information | Herbarium<br>information |
|-----------------------------------|------------------------------|--------------------------------------------------------------------------------------|-------------------|------------------------|--------------------------|
| <i>Aspidistra minutiflora</i>     | Chunrui Lin                  | Haokun Village, Lingyun County, Guangxi Zhuang Autonomous Region, China              | 63                | 1072                   | IBK                      |
| <i>Aspidistra retusa</i>          | Chunrui Lin                  | Xingping Town, Yangshuo County, Guilin City, Guangxi Zhuang Autonomous Region, China | 236               | 1104                   | IBK                      |
| <i>Aspidistra dolichanthera</i>   | Chunrui Lin and<br>Weibin Xu | Longzhou County, Guangxi Zhuang Autonomous Region, China                             | 178               | 1309                   | IBK                      |
| <i>Aspidistra crassifila</i>      | Chunrui Lin                  | Dongzhong Town, Fangchenggang City, Guangxi Zhuang Autonomous Region, China          | 147               | 10013                  | IBK                      |
| <i>Aspidistra erecta</i>          | Chunrui Lin                  | Jingxi City, Guangxi Zhuang Autonomous Region, China                                 | 179               | 8445                   | IBK                      |
| <i>Aspidistra longgangensis</i>   | Chunrui Lin                  | Longzhou County, Guangxi Zhuang Autonomous Region, China                             | 501               | 1359                   | IBK                      |
| <i>Aspidistra nankunshanensis</i> | Chunrui Lin                  | Nankun Mountain, Longmen County, Guangdong Province, China                           | 341               | 1107                   | IBK                      |

**Table S2. Gene composition in the *Aspidistra* plastid genomes.**

| Category of Genes | Group of Genes                     | Name of Genes                                                                                                                                                                                                                                                                                                                                                                                                                                                                                                                                                                                          |
|-------------------|------------------------------------|--------------------------------------------------------------------------------------------------------------------------------------------------------------------------------------------------------------------------------------------------------------------------------------------------------------------------------------------------------------------------------------------------------------------------------------------------------------------------------------------------------------------------------------------------------------------------------------------------------|
| Self-replication  | Ribosomal RNA                      | <i>rrn16S</i> (x2), <i>rrn23S</i> (x2), <i>rrn5S</i> (x2), <i>rrn4.5S</i> (x2)                                                                                                                                                                                                                                                                                                                                                                                                                                                                                                                         |
|                   | Transfer RNA                       | <i>trnA</i> -UGC*(x2), <i>trnC</i> -GCA, <i>trnD</i> -GUC, <i>trnE</i> -UUC, <i>trnF</i> -GAA, <i>trnG</i> -GCC, <i>trnG</i> -UCC*, <i>trnH</i> -GUG (x2), <i>trnI</i> -CAU (x2), <i>trnI</i> -GAU*(x2), <i>trnK</i> -UUU*, <i>trnL</i> -CAA (x2), <i>trnL</i> -UAA*, <i>trnL</i> -UAG, <i>trnM</i> -CAU, <i>trnN</i> -GUU (x2), <i>trnP</i> -UGG, <i>trnQ</i> -UUG, <i>trnR</i> -ACG (x2), <i>trnR</i> -UCU, <i>trnS</i> -GCU, <i>trnS</i> -GGA, <i>trnS</i> -UGA, <i>trnT</i> -GGU, <i>trnT</i> -UGU, <i>trnV</i> -GAC (x2), <i>trnV</i> -UAC*, <i>trnW</i> -CCA, <i>trnY</i> -GUA, <i>trnY</i> -CAU |
|                   | Large subunit of ribosome          | <i>rpl14</i> , <i>rpl16*</i> , <i>rpl2*</i> (x2), <i>rpl20</i> , <i>rpl22</i> , <i>rpl23</i> (x2), <i>rpl32</i> , <i>rpl33</i> , <i>rpl36</i>                                                                                                                                                                                                                                                                                                                                                                                                                                                          |
|                   | DNA dependent RNA polymerase       | <i>rpoA</i> , <i>rpoB</i> , <i>rpoC1*</i> , <i>rpoC2</i>                                                                                                                                                                                                                                                                                                                                                                                                                                                                                                                                               |
|                   | Small subunit of ribosome          | <i>rps11</i> , <i>rps12*</i> (x2), <i>rps14</i> , <i>rps15</i> , <i>rps16*</i> , <i>rps18</i> , <i>rps19</i> (x2), <i>rps2</i> , <i>rps3</i> , <i>rps4</i> , <i>rps7</i> (x2), <i>rps8</i>                                                                                                                                                                                                                                                                                                                                                                                                             |
| Photosynthesis    | Subunits of ATP synthase           | <i>atpA</i> , <i>atpB</i> , <i>atpE</i> , <i>atpF*</i> , <i>atpH</i> , <i>atpI</i>                                                                                                                                                                                                                                                                                                                                                                                                                                                                                                                     |
|                   | Subunits of photosystem II         | <i>psbA</i> , <i>psbB</i> , <i>psbC</i> , <i>psbD</i> , <i>psbE</i> , <i>psbF</i> , <i>psbH</i> , <i>psbI</i> , <i>psbJ</i> , <i>psbK</i> , <i>psbL</i> , <i>psbM</i> , <i>psbN</i> , <i>psbT</i> , <i>psbZ</i> , <i>ycf3**</i>                                                                                                                                                                                                                                                                                                                                                                        |
|                   | Subunits of NADH-dehydrogenase     | <i>ndhA*</i> , <i>ndhB*</i> (x2), <i>ndhC</i> , <i>ndhD</i> , <i>ndhE</i> , <i>ndhF</i> , <i>ndhG</i> , <i>ndhH</i> , <i>ndhI</i> , <i>ndhJ</i> , <i>ndhK</i>                                                                                                                                                                                                                                                                                                                                                                                                                                          |
|                   | Subunits of cytochrome b/f complex | <i>petA</i> , <i>petB*</i> , <i>petD*</i> , <i>petG</i> , <i>petL</i> , <i>petN</i>                                                                                                                                                                                                                                                                                                                                                                                                                                                                                                                    |
|                   | Subunits of photosystem I          | <i>psaA</i> , <i>psaB</i> , <i>psaC</i> , <i>psaI</i> , <i>psaJ</i>                                                                                                                                                                                                                                                                                                                                                                                                                                                                                                                                    |
|                   | Subunit of rubisco                 | <i>rbcL</i>                                                                                                                                                                                                                                                                                                                                                                                                                                                                                                                                                                                            |
| Other genes       | Subunit of Acetyl-CoA-carboxylase  | <i>accD</i>                                                                                                                                                                                                                                                                                                                                                                                                                                                                                                                                                                                            |
|                   | c-type cytochrome synthesis gene   | <i>ccsA</i>                                                                                                                                                                                                                                                                                                                                                                                                                                                                                                                                                                                            |
|                   | Envelop membrane protein           | <i>cemA</i>                                                                                                                                                                                                                                                                                                                                                                                                                                                                                                                                                                                            |
|                   | Protease                           | <i>clpP**</i>                                                                                                                                                                                                                                                                                                                                                                                                                                                                                                                                                                                          |
|                   | Maturase                           | <i>infA</i>                                                                                                                                                                                                                                                                                                                                                                                                                                                                                                                                                                                            |
| Unknown           | Conserves open reading frames      | <i>ycf1</i> , <i>ycf2</i> (x2), <i>ycf4</i>                                                                                                                                                                                                                                                                                                                                                                                                                                                                                                                                                            |

Note: (x2) indicates that the gene is located in the IR regions, resulting in two copies; \* and \*\* represent genes with one/two introns, respectively.

**Table S3. Simple sequence repeats (SSRs) in the seven *Aspidistra* plastid genomes.**

| ID                            | SSR nr. | SSR type | SSR          | size | start  | end    |
|-------------------------------|---------|----------|--------------|------|--------|--------|
| <i>Aspidistra minutiflora</i> | 1       | p1       | (A)11        | 11   | 2942   | 2952   |
| <i>Aspidistra minutiflora</i> | 2       | p1       | (A)10        | 10   | 3563   | 3572   |
| <i>Aspidistra minutiflora</i> | 3       | p1       | (A)10        | 10   | 3825   | 3834   |
| <i>Aspidistra minutiflora</i> | 4       | p4       | (TAAT)3      | 12   | 4450   | 4461   |
| <i>Aspidistra minutiflora</i> | 5       | p1       | (A)10        | 10   | 4538   | 4547   |
| <i>Aspidistra minutiflora</i> | 6       | p3       | (TTA)4       | 12   | 4648   | 4659   |
| <i>Aspidistra minutiflora</i> | 7       | p1       | (C)10        | 10   | 4924   | 4933   |
| <i>Aspidistra minutiflora</i> | 8       | p1       | (T)10        | 10   | 7994   | 8003   |
| <i>Aspidistra minutiflora</i> | 9       | p2       | (TA)8        | 16   | 9223   | 9238   |
| <i>Aspidistra minutiflora</i> | 10      | p2       | (AT)5        | 10   | 14670  | 14679  |
| <i>Aspidistra minutiflora</i> | 11      | p3       | (TTA)4       | 12   | 15730  | 15741  |
| <i>Aspidistra minutiflora</i> | 12      | p1       | (T)15        | 15   | 16486  | 16500  |
| <i>Aspidistra minutiflora</i> | 13      | p1       | (T)10        | 10   | 18547  | 18556  |
| <i>Aspidistra minutiflora</i> | 14      | p1       | (T)11        | 11   | 18653  | 18663  |
| <i>Aspidistra minutiflora</i> | 15      | p2       | (AT)5        | 10   | 20032  | 20041  |
| <i>Aspidistra minutiflora</i> | 16      | p1       | (A)10        | 10   | 22708  | 22717  |
| <i>Aspidistra minutiflora</i> | 17      | p1       | (T)10        | 10   | 23099  | 23108  |
| <i>Aspidistra minutiflora</i> | 18      | p1       | (A)11        | 11   | 27879  | 27889  |
| <i>Aspidistra minutiflora</i> | 19      | p1       | (T)10        | 10   | 28484  | 28493  |
| <i>Aspidistra minutiflora</i> | 20      | p3       | (ATA)4       | 12   | 30037  | 30048  |
| <i>Aspidistra minutiflora</i> | 21      | p2       | (TA)5        | 10   | 30083  | 30092  |
| <i>Aspidistra minutiflora</i> | 22      | p1       | (A)15        | 15   | 44327  | 44341  |
| <i>Aspidistra minutiflora</i> | 23      | p5       | (TTACA)3     | 15   | 46713  | 46727  |
| <i>Aspidistra minutiflora</i> | 24      | p1       | (A)14        | 14   | 47054  | 47067  |
| <i>Aspidistra minutiflora</i> | 25      | p2       | (AT)5        | 10   | 47133  | 47142  |
| <i>Aspidistra minutiflora</i> | 26      | p1       | (A)12        | 12   | 52347  | 52358  |
| <i>Aspidistra minutiflora</i> | 27      | p2       | (TA)5        | 10   | 55693  | 55702  |
| <i>Aspidistra minutiflora</i> | 28      | p4       | (ATTG)3      | 12   | 57585  | 57596  |
| <i>Aspidistra minutiflora</i> | 29      | c        | (AT)5ca(AT)5 | 22   | 57998  | 58019  |
| <i>Aspidistra minutiflora</i> | 30      | p2       | (TC)5        | 10   | 62040  | 62049  |
| <i>Aspidistra minutiflora</i> | 31      | p4       | (AATG)3      | 12   | 62659  | 62670  |
| <i>Aspidistra minutiflora</i> | 32      | p2       | (TA)5        | 10   | 68663  | 68672  |
| <i>Aspidistra minutiflora</i> | 33      | p2       | (AT)8        | 16   | 69104  | 69119  |
| <i>Aspidistra minutiflora</i> | 34      | p1       | (T)10        | 10   | 69669  | 69678  |
| <i>Aspidistra minutiflora</i> | 35      | p1       | (T)10        | 10   | 72009  | 72018  |
| <i>Aspidistra minutiflora</i> | 36      | p1       | (A)10        | 10   | 72504  | 72513  |
| <i>Aspidistra minutiflora</i> | 37      | p1       | (A)10        | 10   | 72537  | 72546  |
| <i>Aspidistra minutiflora</i> | 38      | p1       | (T)10        | 10   | 75197  | 75206  |
| <i>Aspidistra minutiflora</i> | 39      | p1       | (T)10        | 10   | 83051  | 83060  |
| <i>Aspidistra minutiflora</i> | 40      | p4       | (AATA)3      | 12   | 83098  | 83109  |
| <i>Aspidistra minutiflora</i> | 41      | p2       | (GA)5        | 10   | 90921  | 90930  |
| <i>Aspidistra minutiflora</i> | 42      | p1       | (T)10        | 10   | 101384 | 101393 |
| <i>Aspidistra minutiflora</i> | 43      | p4       | (GAAT)3      | 12   | 105737 | 105748 |
| <i>Aspidistra minutiflora</i> | 44      | p5       | (CGAAA)3     | 15   | 109624 | 109638 |
| <i>Aspidistra minutiflora</i> | 45      | p1       | (A)11        | 11   | 114003 | 114013 |
| <i>Aspidistra minutiflora</i> | 46      | p1       | (A)10        | 10   | 114141 | 114150 |

| ID                            | SSR nr. | SSR type | SSR      | size | start  | end    |
|-------------------------------|---------|----------|----------|------|--------|--------|
| <i>Aspidistra minutiflora</i> | 47      | p1       | (T)10    | 10   | 114541 | 114550 |
| <i>Aspidistra minutiflora</i> | 48      | p4       | (AATT)3  | 12   | 115171 | 115182 |
| <i>Aspidistra minutiflora</i> | 49      | p3       | (ATT)4   | 12   | 115629 | 115640 |
| <i>Aspidistra minutiflora</i> | 50      | p1       | (A)11    | 11   | 116389 | 116399 |
| <i>Aspidistra minutiflora</i> | 51      | p4       | (AATA)3  | 12   | 117212 | 117223 |
| <i>Aspidistra minutiflora</i> | 52      | p4       | (TTGA)3  | 12   | 119306 | 119317 |
| <i>Aspidistra minutiflora</i> | 53      | p1       | (T)11    | 11   | 120382 | 120392 |
| <i>Aspidistra minutiflora</i> | 54      | p1       | (A)10    | 10   | 122353 | 122362 |
| <i>Aspidistra minutiflora</i> | 55      | p3       | (ATT)4   | 12   | 125113 | 125124 |
| <i>Aspidistra minutiflora</i> | 56      | p1       | (T)10    | 10   | 126271 | 126280 |
| <i>Aspidistra minutiflora</i> | 57      | p1       | (A)10    | 10   | 128705 | 128714 |
| <i>Aspidistra minutiflora</i> | 58      | p5       | (TTTCG)3 | 15   | 131883 | 131897 |
| <i>Aspidistra minutiflora</i> | 59      | p4       | (CATT)3  | 12   | 135772 | 135783 |
| <i>Aspidistra minutiflora</i> | 60      | p1       | (A)10    | 10   | 140128 | 140137 |
| <i>Aspidistra minutiflora</i> | 61      | p2       | (TC)5    | 10   | 150591 | 150600 |
| <i>Aspidistra retusa</i>      | 1       | p1       | (A)11    | 11   | 2942   | 2952   |
| <i>Aspidistra retusa</i>      | 2       | p1       | (A)12    | 12   | 3563   | 3574   |
| <i>Aspidistra retusa</i>      | 3       | p4       | (TAAT)3  | 12   | 4451   | 4462   |
| <i>Aspidistra retusa</i>      | 4       | p1       | (A)11    | 11   | 4539   | 4549   |
| <i>Aspidistra retusa</i>      | 5       | p3       | (TTA)4   | 12   | 4650   | 4661   |
| <i>Aspidistra retusa</i>      | 6       | p1       | (C)11    | 11   | 4926   | 4936   |
| <i>Aspidistra retusa</i>      | 7       | p2       | (TA)8    | 16   | 9214   | 9229   |
| <i>Aspidistra retusa</i>      | 8       | p2       | (AT)5    | 10   | 14659  | 14668  |
| <i>Aspidistra retusa</i>      | 9       | p3       | (TTA)4   | 12   | 15719  | 15730  |
| <i>Aspidistra retusa</i>      | 10      | p1       | (T)15    | 15   | 16475  | 16489  |
| <i>Aspidistra retusa</i>      | 11      | p1       | (T)10    | 10   | 18543  | 18552  |
| <i>Aspidistra retusa</i>      | 12      | p1       | (T)11    | 11   | 18649  | 18659  |
| <i>Aspidistra retusa</i>      | 13      | p2       | (AT)5    | 10   | 20028  | 20037  |
| <i>Aspidistra retusa</i>      | 14      | p1       | (A)11    | 11   | 22704  | 22714  |
| <i>Aspidistra retusa</i>      | 15      | p1       | (A)11    | 11   | 28803  | 28813  |
| <i>Aspidistra retusa</i>      | 16      | p3       | (ATA)4   | 12   | 30034  | 30045  |
| <i>Aspidistra retusa</i>      | 17      | p2       | (TA)5    | 10   | 30080  | 30089  |
| <i>Aspidistra retusa</i>      | 18      | p1       | (A)15    | 15   | 44389  | 44403  |
| <i>Aspidistra retusa</i>      | 19      | p1       | (A)12    | 12   | 47138  | 47149  |
| <i>Aspidistra retusa</i>      | 20      | p2       | (AT)5    | 10   | 47215  | 47224  |
| <i>Aspidistra retusa</i>      | 21      | p1       | (T)10    | 10   | 48120  | 48129  |
| <i>Aspidistra retusa</i>      | 22      | p1       | (A)12    | 12   | 52401  | 52412  |
| <i>Aspidistra retusa</i>      | 23      | p2       | (TA)5    | 10   | 55747  | 55756  |
| <i>Aspidistra retusa</i>      | 24      | p4       | (ATTG)3  | 12   | 57639  | 57650  |
| <i>Aspidistra retusa</i>      | 25      | p2       | (AT)5    | 10   | 58052  | 58061  |
| <i>Aspidistra retusa</i>      | 26      | p2       | (TC)5    | 10   | 62093  | 62102  |
| <i>Aspidistra retusa</i>      | 27      | p4       | (AATG)3  | 12   | 62712  | 62723  |
| <i>Aspidistra retusa</i>      | 28      | p2       | (TA)5    | 10   | 68622  | 68631  |
| <i>Aspidistra retusa</i>      | 29      | p2       | (AT)9    | 18   | 69073  | 69090  |
| <i>Aspidistra retusa</i>      | 30      | p1       | (T)11    | 11   | 69640  | 69650  |
| <i>Aspidistra retusa</i>      | 31      | p1       | (A)10    | 10   | 71455  | 71464  |
| <i>Aspidistra retusa</i>      | 32      | p1       | (T)10    | 10   | 71710  | 71719  |
| <i>Aspidistra retusa</i>      | 33      | p1       | (T)10    | 10   | 71983  | 71992  |

| ID                              | SSR nr. | SSR type | SSR      | size | start  | end    |
|---------------------------------|---------|----------|----------|------|--------|--------|
| <i>Aspidistra retusa</i>        | 34      | p1       | (A)10    | 10   | 72478  | 72487  |
| <i>Aspidistra retusa</i>        | 35      | p1       | (T)12    | 12   | 79336  | 79347  |
| <i>Aspidistra retusa</i>        | 36      | p4       | (AATA)3  | 12   | 83083  | 83094  |
| <i>Aspidistra retusa</i>        | 37      | p2       | (GA)5    | 10   | 90910  | 90919  |
| <i>Aspidistra retusa</i>        | 38      | p1       | (T)10    | 10   | 101368 | 101377 |
| <i>Aspidistra retusa</i>        | 39      | p4       | (GAAT)3  | 12   | 105721 | 105732 |
| <i>Aspidistra retusa</i>        | 40      | p5       | (CGAAA)3 | 15   | 109605 | 109619 |
| <i>Aspidistra retusa</i>        | 41      | p1       | (A)10    | 10   | 113984 | 113993 |
| <i>Aspidistra retusa</i>        | 42      | p1       | (C)12    | 12   | 114284 | 114295 |
| <i>Aspidistra retusa</i>        | 43      | p1       | (T)10    | 10   | 114532 | 114541 |
| <i>Aspidistra retusa</i>        | 44      | p4       | (AATT)3  | 12   | 115161 | 115172 |
| <i>Aspidistra retusa</i>        | 45      | p1       | (T)10    | 10   | 115265 | 115274 |
| <i>Aspidistra retusa</i>        | 46      | p3       | (ATT)4   | 12   | 115625 | 115636 |
| <i>Aspidistra retusa</i>        | 47      | p1       | (A)11    | 11   | 116385 | 116395 |
| <i>Aspidistra retusa</i>        | 48      | p4       | (AATA)3  | 12   | 117208 | 117219 |
| <i>Aspidistra retusa</i>        | 49      | p4       | (TTGA)3  | 12   | 119302 | 119313 |
| <i>Aspidistra retusa</i>        | 50      | p1       | (A)12    | 12   | 122341 | 122352 |
| <i>Aspidistra retusa</i>        | 51      | p3       | (ATT)4   | 12   | 125103 | 125114 |
| <i>Aspidistra retusa</i>        | 52      | p1       | (T)11    | 11   | 126241 | 126251 |
| <i>Aspidistra retusa</i>        | 53      | p1       | (A)10    | 10   | 128675 | 128684 |
| <i>Aspidistra retusa</i>        | 54      | p5       | (TTTCG)3 | 15   | 131838 | 131852 |
| <i>Aspidistra retusa</i>        | 55      | p4       | (CATT)3  | 12   | 135724 | 135735 |
| <i>Aspidistra retusa</i>        | 56      | p1       | (A)10    | 10   | 140080 | 140089 |
| <i>Aspidistra retusa</i>        | 57      | p2       | (TC)5    | 10   | 150538 | 150547 |
| <i>Aspidistra dolichanthera</i> | 1       | p1       | (A)11    | 11   | 2936   | 2946   |
| <i>Aspidistra dolichanthera</i> | 2       | p1       | (A)17    | 17   | 3557   | 3573   |
| <i>Aspidistra dolichanthera</i> | 3       | p4       | (TAAT)3  | 12   | 4450   | 4461   |
| <i>Aspidistra dolichanthera</i> | 4       | p1       | (A)11    | 11   | 4538   | 4548   |
| <i>Aspidistra dolichanthera</i> | 5       | p3       | (TTA)4   | 12   | 4649   | 4660   |
| <i>Aspidistra dolichanthera</i> | 6       | p1       | (C)15    | 15   | 4925   | 4939   |
| <i>Aspidistra dolichanthera</i> | 7       | p2       | (TA)9    | 18   | 9191   | 9208   |
| <i>Aspidistra dolichanthera</i> | 8       | p2       | (AT)5    | 10   | 14641  | 14650  |
| <i>Aspidistra dolichanthera</i> | 9       | p3       | (TTA)4   | 12   | 15701  | 15712  |
| <i>Aspidistra dolichanthera</i> | 10      | p1       | (T)15    | 15   | 16457  | 16471  |
| <i>Aspidistra dolichanthera</i> | 11      | p1       | (T)10    | 10   | 18525  | 18534  |
| <i>Aspidistra dolichanthera</i> | 12      | p1       | (T)11    | 11   | 18631  | 18641  |
| <i>Aspidistra dolichanthera</i> | 13      | p2       | (AT)5    | 10   | 20010  | 20019  |
| <i>Aspidistra dolichanthera</i> | 14      | p1       | (A)11    | 11   | 22686  | 22696  |
| <i>Aspidistra dolichanthera</i> | 15      | p1       | (A)10    | 10   | 27851  | 27860  |
| <i>Aspidistra dolichanthera</i> | 16      | p3       | (ATA)4   | 12   | 30008  | 30019  |
| <i>Aspidistra dolichanthera</i> | 17      | p2       | (TA)5    | 10   | 30054  | 30063  |
| <i>Aspidistra dolichanthera</i> | 18      | p1       | (A)14    | 14   | 44348  | 44361  |
| <i>Aspidistra dolichanthera</i> | 19      | p1       | (A)14    | 14   | 47081  | 47094  |
| <i>Aspidistra dolichanthera</i> | 20      | p2       | (AT)5    | 10   | 47160  | 47169  |
| <i>Aspidistra dolichanthera</i> | 21      | p1       | (T)11    | 11   | 48065  | 48075  |
| <i>Aspidistra dolichanthera</i> | 22      | p1       | (A)12    | 12   | 52348  | 52359  |
| <i>Aspidistra dolichanthera</i> | 23      | p2       | (TA)5    | 10   | 55694  | 55703  |
| <i>Aspidistra dolichanthera</i> | 24      | p4       | (ATTG)3  | 12   | 57586  | 57597  |

| ID                              | SSR nr. | SSR type | SSR          | size | start  | end    |
|---------------------------------|---------|----------|--------------|------|--------|--------|
| <i>Aspidistra dolichanthera</i> | 25      | c        | (AT)5ca(AT)5 | 22   | 57999  | 58020  |
| <i>Aspidistra dolichanthera</i> | 26      | p2       | (TC)5        | 10   | 62041  | 62050  |
| <i>Aspidistra dolichanthera</i> | 27      | p4       | (AATG)3      | 12   | 62660  | 62671  |
| <i>Aspidistra dolichanthera</i> | 28      | p2       | (TA)5        | 10   | 68633  | 68642  |
| <i>Aspidistra dolichanthera</i> | 29      | p2       | (AT)6        | 12   | 69084  | 69095  |
| <i>Aspidistra dolichanthera</i> | 30      | p1       | (T)11        | 11   | 69645  | 69655  |
| <i>Aspidistra dolichanthera</i> | 31      | p1       | (A)11        | 11   | 71460  | 71470  |
| <i>Aspidistra dolichanthera</i> | 32      | p1       | (T)12        | 12   | 71716  | 71727  |
| <i>Aspidistra dolichanthera</i> | 33      | p1       | (A)11        | 11   | 72485  | 72495  |
| <i>Aspidistra dolichanthera</i> | 34      | p1       | (T)10        | 10   | 75178  | 75187  |
| <i>Aspidistra dolichanthera</i> | 35      | p1       | (T)10        | 10   | 83047  | 83056  |
| <i>Aspidistra dolichanthera</i> | 36      | p4       | (AATA)3      | 12   | 83094  | 83105  |
| <i>Aspidistra dolichanthera</i> | 37      | p2       | (GA)5        | 10   | 90915  | 90924  |
| <i>Aspidistra dolichanthera</i> | 38      | p1       | (T)10        | 10   | 101378 | 101387 |
| <i>Aspidistra dolichanthera</i> | 39      | p4       | (GAAT)3      | 12   | 105731 | 105742 |
| <i>Aspidistra dolichanthera</i> | 40      | p5       | (CGAAA)3     | 15   | 109615 | 109629 |
| <i>Aspidistra dolichanthera</i> | 41      | p1       | (A)10        | 10   | 113818 | 113827 |
| <i>Aspidistra dolichanthera</i> | 42      | p1       | (A)10        | 10   | 113995 | 114004 |
| <i>Aspidistra dolichanthera</i> | 43      | p1       | (A)11        | 11   | 114132 | 114142 |
| <i>Aspidistra dolichanthera</i> | 44      | p1       | (C)11        | 11   | 114297 | 114307 |
| <i>Aspidistra dolichanthera</i> | 45      | p1       | (T)10        | 10   | 114535 | 114544 |
| <i>Aspidistra dolichanthera</i> | 46      | p4       | (AATT)3      | 12   | 115165 | 115176 |
| <i>Aspidistra dolichanthera</i> | 47      | p3       | (ATT)4       | 12   | 115629 | 115640 |
| <i>Aspidistra dolichanthera</i> | 48      | p1       | (A)11        | 11   | 116389 | 116399 |
| <i>Aspidistra dolichanthera</i> | 49      | p4       | (AATA)3      | 12   | 117212 | 117223 |
| <i>Aspidistra dolichanthera</i> | 50      | p4       | (TTGA)3      | 12   | 119306 | 119317 |
| <i>Aspidistra dolichanthera</i> | 51      | p1       | (T)12        | 12   | 120382 | 120393 |
| <i>Aspidistra dolichanthera</i> | 52      | p1       | (A)10        | 10   | 122348 | 122357 |
| <i>Aspidistra dolichanthera</i> | 53      | p3       | (ATT)4       | 12   | 125108 | 125119 |
| <i>Aspidistra dolichanthera</i> | 54      | p1       | (T)10        | 10   | 126246 | 126255 |
| <i>Aspidistra dolichanthera</i> | 55      | p1       | (A)10        | 10   | 128680 | 128689 |
| <i>Aspidistra dolichanthera</i> | 56      | p5       | (TTTCG)3     | 15   | 131858 | 131872 |
| <i>Aspidistra dolichanthera</i> | 57      | p4       | (CATT)3      | 12   | 135744 | 135755 |
| <i>Aspidistra dolichanthera</i> | 58      | p1       | (A)10        | 10   | 140100 | 140109 |
| <i>Aspidistra dolichanthera</i> | 59      | p2       | (TC)5        | 10   | 150563 | 150572 |
| <i>Aspidistra crassifila</i>    | 1       | p1       | (A)10        | 10   | 2936   | 2945   |
| <i>Aspidistra crassifila</i>    | 2       | p1       | (A)15        | 15   | 3556   | 3570   |
| <i>Aspidistra crassifila</i>    | 3       | p4       | (TAAT)3      | 12   | 4447   | 4458   |
| <i>Aspidistra crassifila</i>    | 4       | p1       | (A)10        | 10   | 4535   | 4544   |
| <i>Aspidistra crassifila</i>    | 5       | p3       | (TTA)4       | 12   | 4645   | 4656   |
| <i>Aspidistra crassifila</i>    | 6       | p1       | (C)14        | 14   | 4921   | 4934   |
| <i>Aspidistra crassifila</i>    | 7       | p1       | (T)10        | 10   | 8172   | 8181   |
| <i>Aspidistra crassifila</i>    | 8       | p2       | (TA)6        | 12   | 9206   | 9217   |
| <i>Aspidistra crassifila</i>    | 9       | p2       | (AT)5        | 10   | 14649  | 14658  |
| <i>Aspidistra crassifila</i>    | 10      | p3       | (TTA)4       | 12   | 15709  | 15720  |
| <i>Aspidistra crassifila</i>    | 11      | p1       | (T)15        | 15   | 16465  | 16479  |
| <i>Aspidistra crassifila</i>    | 12      | p1       | (T)10        | 10   | 18539  | 18548  |
| <i>Aspidistra crassifila</i>    | 13      | p1       | (T)11        | 11   | 18645  | 18655  |

| ID                           | SSR nr. | SSR type | SSR          | size | start  | end    |
|------------------------------|---------|----------|--------------|------|--------|--------|
| <i>Aspidistra crassifila</i> | 14      | p2       | (AT)5        | 10   | 20024  | 20033  |
| <i>Aspidistra crassifila</i> | 15      | p1       | (A)12        | 12   | 22700  | 22711  |
| <i>Aspidistra crassifila</i> | 16      | p1       | (T)11        | 11   | 23093  | 23103  |
| <i>Aspidistra crassifila</i> | 17      | p3       | (ATA)4       | 12   | 30030  | 30041  |
| <i>Aspidistra crassifila</i> | 18      | p2       | (TA)5        | 10   | 30076  | 30085  |
| <i>Aspidistra crassifila</i> | 19      | p1       | (T)10        | 10   | 32208  | 32217  |
| <i>Aspidistra crassifila</i> | 20      | p1       | (T)10        | 10   | 42497  | 42506  |
| <i>Aspidistra crassifila</i> | 21      | p1       | (A)16        | 16   | 44341  | 44356  |
| <i>Aspidistra crassifila</i> | 22      | p1       | (A)15        | 15   | 47098  | 47112  |
| <i>Aspidistra crassifila</i> | 23      | p2       | (AT)5        | 10   | 47178  | 47187  |
| <i>Aspidistra crassifila</i> | 24      | p1       | (A)12        | 12   | 52364  | 52375  |
| <i>Aspidistra crassifila</i> | 25      | p1       | (T)11        | 11   | 55343  | 55353  |
| <i>Aspidistra crassifila</i> | 26      | p2       | (TA)5        | 10   | 55711  | 55720  |
| <i>Aspidistra crassifila</i> | 27      | p4       | (ATTG)3      | 12   | 57603  | 57614  |
| <i>Aspidistra crassifila</i> | 28      | c        | (AT)5ca(AT)5 | 22   | 58016  | 58037  |
| <i>Aspidistra crassifila</i> | 29      | p1       | (T)10        | 10   | 58570  | 58579  |
| <i>Aspidistra crassifila</i> | 30      | p2       | (TC)5        | 10   | 62057  | 62066  |
| <i>Aspidistra crassifila</i> | 31      | p4       | (AATG)3      | 12   | 62676  | 62687  |
| <i>Aspidistra crassifila</i> | 32      | p2       | (TA)5        | 10   | 68668  | 68677  |
| <i>Aspidistra crassifila</i> | 33      | p2       | (AT)9        | 18   | 69119  | 69136  |
| <i>Aspidistra crassifila</i> | 34      | p1       | (A)11        | 11   | 71499  | 71509  |
| <i>Aspidistra crassifila</i> | 35      | p1       | (T)13        | 13   | 71755  | 71767  |
| <i>Aspidistra crassifila</i> | 36      | p1       | (A)10        | 10   | 72524  | 72533  |
| <i>Aspidistra crassifila</i> | 37      | p1       | (T)10        | 10   | 75216  | 75225  |
| <i>Aspidistra crassifila</i> | 38      | p1       | (T)10        | 10   | 83084  | 83093  |
| <i>Aspidistra crassifila</i> | 39      | p4       | (AATA)3      | 12   | 83131  | 83142  |
| <i>Aspidistra crassifila</i> | 40      | p1       | (T)10        | 10   | 83643  | 83652  |
| <i>Aspidistra crassifila</i> | 41      | p2       | (GA)5        | 10   | 90947  | 90956  |
| <i>Aspidistra crassifila</i> | 42      | p4       | (GAAT)3      | 12   | 105753 | 105764 |
| <i>Aspidistra crassifila</i> | 43      | p5       | (CGAAA)3     | 15   | 109637 | 109651 |
| <i>Aspidistra crassifila</i> | 44      | p1       | (A)10        | 10   | 113840 | 113849 |
| <i>Aspidistra crassifila</i> | 45      | p1       | (A)13        | 13   | 114017 | 114029 |
| <i>Aspidistra crassifila</i> | 46      | p1       | (A)10        | 10   | 114157 | 114166 |
| <i>Aspidistra crassifila</i> | 47      | p1       | (C)12        | 12   | 114321 | 114332 |
| <i>Aspidistra crassifila</i> | 48      | p1       | (T)10        | 10   | 114560 | 114569 |
| <i>Aspidistra crassifila</i> | 49      | p4       | (AATT)3      | 12   | 115190 | 115201 |
| <i>Aspidistra crassifila</i> | 50      | p1       | (T)10        | 10   | 115294 | 115303 |
| <i>Aspidistra crassifila</i> | 51      | p3       | (ATT)4       | 12   | 115655 | 115666 |
| <i>Aspidistra crassifila</i> | 52      | p1       | (A)11        | 11   | 116415 | 116425 |
| <i>Aspidistra crassifila</i> | 53      | p4       | (AATA)3      | 12   | 117238 | 117249 |
| <i>Aspidistra crassifila</i> | 54      | p2       | (TA)5        | 10   | 119242 | 119251 |
| <i>Aspidistra crassifila</i> | 55      | p4       | (TTGA)3      | 12   | 119332 | 119343 |
| <i>Aspidistra crassifila</i> | 56      | p1       | (T)10        | 10   | 120408 | 120417 |
| <i>Aspidistra crassifila</i> | 57      | p1       | (A)10        | 10   | 122372 | 122381 |
| <i>Aspidistra crassifila</i> | 58      | p3       | (ATT)4       | 12   | 125132 | 125143 |
| <i>Aspidistra crassifila</i> | 59      | p1       | (T)10        | 10   | 126270 | 126279 |
| <i>Aspidistra crassifila</i> | 60      | p1       | (A)10        | 10   | 128704 | 128713 |
| <i>Aspidistra crassifila</i> | 61      | p5       | (TTTCG)3     | 15   | 131882 | 131896 |

| ID                           | SSR nr. | SSR type | SSR          | size | start  | end    |
|------------------------------|---------|----------|--------------|------|--------|--------|
| <i>Aspidistra crassifila</i> | 62      | p4       | (CATT)3      | 12   | 135768 | 135779 |
| <i>Aspidistra crassifila</i> | 63      | p2       | (TC)5        | 10   | 150577 | 150586 |
| <i>Aspidistra erecta</i>     | 1       | p3       | (CAG)4       | 12   | 675    | 686    |
| <i>Aspidistra erecta</i>     | 2       | p1       | (A)10        | 10   | 2942   | 2951   |
| <i>Aspidistra erecta</i>     | 3       | p1       | (A)12        | 12   | 3563   | 3574   |
| <i>Aspidistra erecta</i>     | 4       | p4       | (TAAT)3      | 12   | 4452   | 4463   |
| <i>Aspidistra erecta</i>     | 5       | p3       | (TTA)4       | 12   | 4649   | 4660   |
| <i>Aspidistra erecta</i>     | 6       | p1       | (C)12        | 12   | 4930   | 4941   |
| <i>Aspidistra erecta</i>     | 7       | p1       | (T)10        | 10   | 7708   | 7717   |
| <i>Aspidistra erecta</i>     | 8       | p1       | (T)10        | 10   | 8166   | 8175   |
| <i>Aspidistra erecta</i>     | 9       | p4       | (TTAA)3      | 12   | 9137   | 9148   |
| <i>Aspidistra erecta</i>     | 10      | p1       | (A)11        | 11   | 9486   | 9496   |
| <i>Aspidistra erecta</i>     | 11      | p1       | (T)12        | 12   | 13563  | 13574  |
| <i>Aspidistra erecta</i>     | 12      | p2       | (AT)5        | 10   | 14598  | 14607  |
| <i>Aspidistra erecta</i>     | 13      | p3       | (TTA)4       | 12   | 15658  | 15669  |
| <i>Aspidistra erecta</i>     | 14      | p1       | (T)14        | 14   | 16414  | 16427  |
| <i>Aspidistra erecta</i>     | 15      | p1       | (T)10        | 10   | 18481  | 18490  |
| <i>Aspidistra erecta</i>     | 16      | p1       | (T)11        | 11   | 18587  | 18597  |
| <i>Aspidistra erecta</i>     | 17      | p2       | (AT)5        | 10   | 19966  | 19975  |
| <i>Aspidistra erecta</i>     | 18      | p1       | (A)10        | 10   | 22648  | 22657  |
| <i>Aspidistra erecta</i>     | 19      | p1       | (T)10        | 10   | 23039  | 23048  |
| <i>Aspidistra erecta</i>     | 20      | p1       | (A)11        | 11   | 27820  | 27830  |
| <i>Aspidistra erecta</i>     | 21      | p3       | (ATA)4       | 12   | 29978  | 29989  |
| <i>Aspidistra erecta</i>     | 22      | p2       | (TA)5        | 10   | 30024  | 30033  |
| <i>Aspidistra erecta</i>     | 23      | p1       | (T)10        | 10   | 32156  | 32165  |
| <i>Aspidistra erecta</i>     | 24      | p1       | (A)14        | 14   | 44305  | 44318  |
| <i>Aspidistra erecta</i>     | 25      | p1       | (A)15        | 15   | 47043  | 47057  |
| <i>Aspidistra erecta</i>     | 26      | p2       | (AT)6        | 12   | 47123  | 47134  |
| <i>Aspidistra erecta</i>     | 27      | p1       | (T)11        | 11   | 48030  | 48040  |
| <i>Aspidistra erecta</i>     | 28      | p5       | (TTGAT)3     | 15   | 51524  | 51538  |
| <i>Aspidistra erecta</i>     | 29      | p1       | (A)10        | 10   | 52310  | 52319  |
| <i>Aspidistra erecta</i>     | 30      | p1       | (T)10        | 10   | 55287  | 55296  |
| <i>Aspidistra erecta</i>     | 31      | p2       | (TA)5        | 10   | 55668  | 55677  |
| <i>Aspidistra erecta</i>     | 32      | p4       | (ATTG)3      | 12   | 57560  | 57571  |
| <i>Aspidistra erecta</i>     | 33      | c        | (AT)5ca(AT)5 | 22   | 57972  | 57993  |
| <i>Aspidistra erecta</i>     | 34      | p2       | (TC)5        | 10   | 62002  | 62011  |
| <i>Aspidistra erecta</i>     | 35      | p2       | (TA)5        | 10   | 68619  | 68628  |
| <i>Aspidistra erecta</i>     | 36      | p2       | (AT)9        | 18   | 69070  | 69087  |
| <i>Aspidistra erecta</i>     | 37      | p1       | (T)11        | 11   | 69632  | 69642  |
| <i>Aspidistra erecta</i>     | 38      | p4       | (TAAA)3      | 12   | 70331  | 70342  |
| <i>Aspidistra erecta</i>     | 39      | p1       | (A)11        | 11   | 71447  | 71457  |
| <i>Aspidistra erecta</i>     | 40      | p1       | (T)11        | 11   | 71703  | 71713  |
| <i>Aspidistra erecta</i>     | 41      | p1       | (A)10        | 10   | 72503  | 72512  |
| <i>Aspidistra erecta</i>     | 42      | p1       | (T)10        | 10   | 75163  | 75172  |
| <i>Aspidistra erecta</i>     | 43      | p1       | (T)10        | 10   | 83014  | 83023  |
| <i>Aspidistra erecta</i>     | 44      | p4       | (AATA)3      | 12   | 83061  | 83072  |
| <i>Aspidistra erecta</i>     | 45      | p1       | (T)10        | 10   | 83768  | 83777  |
| <i>Aspidistra erecta</i>     | 46      | p2       | (GA)5        | 10   | 90905  | 90914  |



| ID                              | SSR nr. | SSR type | SSR                     | size | start  | end    |
|---------------------------------|---------|----------|-------------------------|------|--------|--------|
| <i>Aspidistra erecta</i>        | 47      | p1       | (T)10                   | 10   | 101373 | 101382 |
| <i>Aspidistra erecta</i>        | 48      | p4       | (GAAT)3                 | 12   | 105726 | 105737 |
| <i>Aspidistra erecta</i>        | 49      | p5       | (CGAAA)3                | 15   | 109617 | 109631 |
| <i>Aspidistra erecta</i>        | 50      | p1       | (A)11                   | 11   | 114131 | 114141 |
| <i>Aspidistra erecta</i>        | 51      | p1       | (C)11                   | 11   | 114296 | 114306 |
| <i>Aspidistra erecta</i>        | 52      | p4       | (AATT)3                 | 12   | 115163 | 115174 |
| <i>Aspidistra erecta</i>        | 53      | p3       | (ATT)4                  | 12   | 115627 | 115638 |
| <i>Aspidistra erecta</i>        | 54      | p1       | (A)11                   | 11   | 116387 | 116397 |
| <i>Aspidistra erecta</i>        | 55      | p4       | (AATA)3                 | 12   | 117210 | 117221 |
| <i>Aspidistra erecta</i>        | 56      | p4       | (TTGA)3                 | 12   | 119307 | 119318 |
| <i>Aspidistra erecta</i>        | 57      | p1       | (T)11                   | 11   | 120383 | 120393 |
| <i>Aspidistra erecta</i>        | 58      | p1       | (A)10                   | 10   | 122348 | 122357 |
| <i>Aspidistra erecta</i>        | 59      | p1       | (T)10                   | 10   | 126246 | 126255 |
| <i>Aspidistra erecta</i>        | 60      | p1       | (A)10                   | 10   | 128683 | 128692 |
| <i>Aspidistra erecta</i>        | 61      | p5       | (TTTCG)3                | 15   | 131867 | 131881 |
| <i>Aspidistra erecta</i>        | 62      | p4       | (CATT)3                 | 12   | 135760 | 135771 |
| <i>Aspidistra erecta</i>        | 63      | p1       | (A)10                   | 10   | 140116 | 140125 |
| <i>Aspidistra erecta</i>        | 64      | p2       | (TC)5                   | 10   | 150584 | 150593 |
| <i>Aspidistra longgangensis</i> | 1       | p1       | (A)11                   | 11   | 2942   | 2952   |
| <i>Aspidistra longgangensis</i> | 2       | p1       | (A)16                   | 16   | 3563   | 3578   |
| <i>Aspidistra longgangensis</i> | 3       | p4       | (TAAT)3                 | 12   | 4455   | 4466   |
| <i>Aspidistra longgangensis</i> | 4       | p3       | (TTA)4                  | 12   | 4652   | 4663   |
| <i>Aspidistra longgangensis</i> | 5       | p1       | (C)12                   | 12   | 4928   | 4939   |
| <i>Aspidistra longgangensis</i> | 6       | p1       | (A)10                   | 10   | 8343   | 8352   |
| <i>Aspidistra longgangensis</i> | 7       | p2       | (TA)8                   | 16   | 9202   | 9217   |
| <i>Aspidistra longgangensis</i> | 8       | p1       | (A)10                   | 10   | 9543   | 9552   |
| <i>Aspidistra longgangensis</i> | 9       | p2       | (AT)5                   | 10   | 14650  | 14659  |
| <i>Aspidistra longgangensis</i> | 10      | p3       | (TTA)4                  | 12   | 15710  | 15721  |
| <i>Aspidistra longgangensis</i> | 11      | p1       | (T)15                   | 15   | 16466  | 16480  |
| <i>Aspidistra longgangensis</i> | 12      | p1       | (T)10                   | 10   | 18504  | 18513  |
| <i>Aspidistra longgangensis</i> | 13      | p1       | (T)11                   | 11   | 18610  | 18620  |
| <i>Aspidistra longgangensis</i> | 14      | p2       | (AT)5                   | 10   | 19989  | 19998  |
| <i>Aspidistra longgangensis</i> | 15      | p1       | (T)11                   | 11   | 21274  | 21284  |
| <i>Aspidistra longgangensis</i> | 16      | c        | (T)10gactttgttcaat(A)12 | 35   | 22642  | 22676  |
| <i>Aspidistra longgangensis</i> | 17      | p1       | (T)11                   | 11   | 23058  | 23068  |
| <i>Aspidistra longgangensis</i> | 18      | p1       | (A)10                   | 10   | 27839  | 27848  |
| <i>Aspidistra longgangensis</i> | 19      | p3       | (ATA)4                  | 12   | 29995  | 30006  |
| <i>Aspidistra longgangensis</i> | 20      | p2       | (TA)5                   | 10   | 30041  | 30050  |
| <i>Aspidistra longgangensis</i> | 21      | p1       | (T)10                   | 10   | 32173  | 32182  |
| <i>Aspidistra longgangensis</i> | 22      | p1       | (A)13                   | 13   | 44325  | 44337  |
| <i>Aspidistra longgangensis</i> | 23      | p1       | (A)17                   | 17   | 47054  | 47070  |
| <i>Aspidistra longgangensis</i> | 24      | p2       | (AT)5                   | 10   | 47136  | 47145  |
| <i>Aspidistra longgangensis</i> | 25      | p1       | (T)10                   | 10   | 48041  | 48050  |
| <i>Aspidistra longgangensis</i> | 26      | p1       | (A)10                   | 10   | 52304  | 52313  |
| <i>Aspidistra longgangensis</i> | 27      | p1       | (T)10                   | 10   | 52480  | 52489  |
| <i>Aspidistra longgangensis</i> | 28      | p2       | (TA)5                   | 10   | 55643  | 55652  |
| <i>Aspidistra longgangensis</i> | 29      | p4       | (ATTG)3                 | 12   | 57535  | 57546  |
| <i>Aspidistra longgangensis</i> | 30      | c        | (AT)5ca(AT)5            | 22   | 57948  | 57969  |

| ID                                | SSR nr. | SSR type | SSR      | size | start  | end    |
|-----------------------------------|---------|----------|----------|------|--------|--------|
| <i>Aspidistra longgangensis</i>   | 31      | p1       | (A)11    | 11   | 59623  | 59633  |
| <i>Aspidistra longgangensis</i>   | 32      | p2       | (TC)5    | 10   | 62000  | 62009  |
| <i>Aspidistra longgangensis</i>   | 33      | p4       | (AATG)3  | 12   | 62619  | 62630  |
| <i>Aspidistra longgangensis</i>   | 34      | p2       | (TA)5    | 10   | 68633  | 68642  |
| <i>Aspidistra longgangensis</i>   | 35      | p2       | (AT)10   | 20   | 69088  | 69107  |
| <i>Aspidistra longgangensis</i>   | 36      | p1       | (T)10    | 10   | 69646  | 69655  |
| <i>Aspidistra longgangensis</i>   | 37      | p1       | (A)10    | 10   | 71461  | 71470  |
| <i>Aspidistra longgangensis</i>   | 38      | p1       | (T)10    | 10   | 71988  | 71997  |
| <i>Aspidistra longgangensis</i>   | 39      | p1       | (A)10    | 10   | 72483  | 72492  |
| <i>Aspidistra longgangensis</i>   | 40      | p1       | (A)10    | 10   | 72516  | 72525  |
| <i>Aspidistra longgangensis</i>   | 41      | p1       | (T)10    | 10   | 83029  | 83038  |
| <i>Aspidistra longgangensis</i>   | 42      | p4       | (AATA)3  | 12   | 83076  | 83087  |
| <i>Aspidistra longgangensis</i>   | 43      | p2       | (GA)5    | 10   | 90904  | 90913  |
| <i>Aspidistra longgangensis</i>   | 44      | p1       | (T)10    | 10   | 101367 | 101376 |
| <i>Aspidistra longgangensis</i>   | 45      | p1       | (T)11    | 11   | 104424 | 104434 |
| <i>Aspidistra longgangensis</i>   | 46      | p4       | (GAAT)3  | 12   | 105722 | 105733 |
| <i>Aspidistra longgangensis</i>   | 47      | p5       | (CGAAA)3 | 15   | 109599 | 109613 |
| <i>Aspidistra longgangensis</i>   | 48      | p1       | (A)13    | 13   | 114115 | 114127 |
| <i>Aspidistra longgangensis</i>   | 49      | p1       | (T)10    | 10   | 114517 | 114526 |
| <i>Aspidistra longgangensis</i>   | 50      | p4       | (AATT)3  | 12   | 115142 | 115153 |
| <i>Aspidistra longgangensis</i>   | 51      | p1       | (T)10    | 10   | 115246 | 115255 |
| <i>Aspidistra longgangensis</i>   | 52      | p3       | (ATT)4   | 12   | 115608 | 115619 |
| <i>Aspidistra longgangensis</i>   | 53      | p1       | (A)11    | 11   | 116368 | 116378 |
| <i>Aspidistra longgangensis</i>   | 54      | p4       | (AATA)3  | 12   | 117191 | 117202 |
| <i>Aspidistra longgangensis</i>   | 55      | p4       | (TTGA)3  | 12   | 119285 | 119296 |
| <i>Aspidistra longgangensis</i>   | 56      | p1       | (A)10    | 10   | 122315 | 122324 |
| <i>Aspidistra longgangensis</i>   | 57      | p3       | (ATT)4   | 12   | 125075 | 125086 |
| <i>Aspidistra longgangensis</i>   | 58      | p1       | (T)10    | 10   | 126213 | 126222 |
| <i>Aspidistra longgangensis</i>   | 59      | p1       | (A)10    | 10   | 128647 | 128656 |
| <i>Aspidistra longgangensis</i>   | 60      | p5       | (TTTCG)3 | 15   | 131825 | 131839 |
| <i>Aspidistra longgangensis</i>   | 61      | p4       | (CATT)3  | 12   | 135704 | 135715 |
| <i>Aspidistra longgangensis</i>   | 62      | p1       | (A)11    | 11   | 137004 | 137014 |
| <i>Aspidistra longgangensis</i>   | 63      | p1       | (A)10    | 10   | 140062 | 140071 |
| <i>Aspidistra longgangensis</i>   | 64      | p2       | (TC)5    | 10   | 150525 | 150534 |
| <i>Aspidistra nankunshanensis</i> | 1       | p1       | (A)11    | 11   | 2942   | 2952   |
| <i>Aspidistra nankunshanensis</i> | 2       | p1       | (A)14    | 14   | 3563   | 3576   |
| <i>Aspidistra nankunshanensis</i> | 3       | p4       | (TAAT)3  | 12   | 4453   | 4464   |
| <i>Aspidistra nankunshanensis</i> | 4       | p1       | (A)10    | 10   | 4541   | 4550   |
| <i>Aspidistra nankunshanensis</i> | 5       | p3       | (TTA)4   | 12   | 4651   | 4662   |
| <i>Aspidistra nankunshanensis</i> | 6       | p1       | (C)13    | 13   | 4929   | 4941   |
| <i>Aspidistra nankunshanensis</i> | 7       | p1       | (T)10    | 10   | 6489   | 6498   |
| <i>Aspidistra nankunshanensis</i> | 8       | p1       | (T)10    | 10   | 7977   | 7986   |
| <i>Aspidistra nankunshanensis</i> | 9       | p2       | (TA)8    | 16   | 9190   | 9205   |
| <i>Aspidistra nankunshanensis</i> | 10      | p1       | (T)10    | 10   | 13604  | 13613  |
| <i>Aspidistra nankunshanensis</i> | 11      | p2       | (AT)5    | 10   | 14638  | 14647  |
| <i>Aspidistra nankunshanensis</i> | 12      | p3       | (TTA)4   | 12   | 15698  | 15709  |
| <i>Aspidistra nankunshanensis</i> | 13      | p1       | (T)14    | 14   | 16454  | 16467  |
| <i>Aspidistra nankunshanensis</i> | 14      | p1       | (T)10    | 10   | 18521  | 18530  |

| ID                                | SSR nr. | SSR type | SSR          | size | start  | end    |
|-----------------------------------|---------|----------|--------------|------|--------|--------|
| <i>Aspidistra nankunshanensis</i> | 15      | p1       | (T)11        | 11   | 18627  | 18637  |
| <i>Aspidistra nankunshanensis</i> | 16      | p2       | (AT)5        | 10   | 20006  | 20015  |
| <i>Aspidistra nankunshanensis</i> | 17      | p1       | (A)11        | 11   | 22682  | 22692  |
| <i>Aspidistra nankunshanensis</i> | 18      | p1       | (T)10        | 10   | 23074  | 23083  |
| <i>Aspidistra nankunshanensis</i> | 19      | p1       | (A)10        | 10   | 27854  | 27863  |
| <i>Aspidistra nankunshanensis</i> | 20      | p3       | (ATA)4       | 12   | 30011  | 30022  |
| <i>Aspidistra nankunshanensis</i> | 21      | p2       | (TA)5        | 10   | 30057  | 30066  |
| <i>Aspidistra nankunshanensis</i> | 22      | p1       | (T)10        | 10   | 32189  | 32198  |
| <i>Aspidistra nankunshanensis</i> | 23      | p1       | (A)14        | 14   | 44372  | 44385  |
| <i>Aspidistra nankunshanensis</i> | 24      | p1       | (A)13        | 13   | 47114  | 47126  |
| <i>Aspidistra nankunshanensis</i> | 25      | p2       | (AT)5        | 10   | 47192  | 47201  |
| <i>Aspidistra nankunshanensis</i> | 26      | p1       | (T)11        | 11   | 48097  | 48107  |
| <i>Aspidistra nankunshanensis</i> | 27      | p1       | (A)14        | 14   | 52380  | 52393  |
| <i>Aspidistra nankunshanensis</i> | 28      | p1       | (T)10        | 10   | 55361  | 55370  |
| <i>Aspidistra nankunshanensis</i> | 29      | p2       | (TA)5        | 10   | 55729  | 55738  |
| <i>Aspidistra nankunshanensis</i> | 30      | p4       | (ATTG)3      | 12   | 57621  | 57632  |
| <i>Aspidistra nankunshanensis</i> | 31      | c        | (AT)5ca(AT)5 | 22   | 58034  | 58055  |
| <i>Aspidistra nankunshanensis</i> | 32      | p1       | (A)11        | 11   | 59709  | 59719  |
| <i>Aspidistra nankunshanensis</i> | 33      | p2       | (TC)5        | 10   | 62059  | 62068  |
| <i>Aspidistra nankunshanensis</i> | 34      | p4       | (AATG)3      | 12   | 62678  | 62689  |
| <i>Aspidistra nankunshanensis</i> | 35      | p2       | (TA)5        | 10   | 68689  | 68698  |
| <i>Aspidistra nankunshanensis</i> | 36      | p2       | (AT)9        | 18   | 69140  | 69157  |
| <i>Aspidistra nankunshanensis</i> | 37      | p1       | (T)10        | 10   | 69707  | 69716  |
| <i>Aspidistra nankunshanensis</i> | 38      | p4       | (TAAA)3      | 12   | 70406  | 70417  |
| <i>Aspidistra nankunshanensis</i> | 39      | p1       | (A)10        | 10   | 71522  | 71531  |
| <i>Aspidistra nankunshanensis</i> | 40      | p1       | (T)10        | 10   | 72049  | 72058  |
| <i>Aspidistra nankunshanensis</i> | 41      | p1       | (A)11        | 11   | 72433  | 72443  |
| <i>Aspidistra nankunshanensis</i> | 42      | p1       | (A)10        | 10   | 72548  | 72557  |
| <i>Aspidistra nankunshanensis</i> | 43      | p1       | (T)10        | 10   | 83108  | 83117  |
| <i>Aspidistra nankunshanensis</i> | 44      | p4       | (AATA)3      | 12   | 83155  | 83166  |
| <i>Aspidistra nankunshanensis</i> | 45      | p2       | (GA)5        | 10   | 90983  | 90992  |
| <i>Aspidistra nankunshanensis</i> | 46      | p1       | (T)10        | 10   | 101464 | 101473 |
| <i>Aspidistra nankunshanensis</i> | 47      | p4       | (GAAT)3      | 12   | 105817 | 105828 |
| <i>Aspidistra nankunshanensis</i> | 48      | p5       | (CGAAA)3     | 15   | 109701 | 109715 |
| <i>Aspidistra nankunshanensis</i> | 49      | p1       | (A)11        | 11   | 114080 | 114090 |
| <i>Aspidistra nankunshanensis</i> | 50      | p1       | (A)11        | 11   | 114218 | 114228 |
| <i>Aspidistra nankunshanensis</i> | 51      | p1       | (C)10        | 10   | 114383 | 114392 |
| <i>Aspidistra nankunshanensis</i> | 52      | p1       | (T)10        | 10   | 114620 | 114629 |
| <i>Aspidistra nankunshanensis</i> | 53      | p4       | (AATT)3      | 12   | 115250 | 115261 |
| <i>Aspidistra nankunshanensis</i> | 54      | p3       | (ATT)4       | 12   | 115714 | 115725 |
| <i>Aspidistra nankunshanensis</i> | 55      | p1       | (A)11        | 11   | 116474 | 116484 |
| <i>Aspidistra nankunshanensis</i> | 56      | p4       | (AATA)3      | 12   | 117297 | 117308 |
| <i>Aspidistra nankunshanensis</i> | 57      | p4       | (TTGA)3      | 12   | 119391 | 119402 |
| <i>Aspidistra nankunshanensis</i> | 58      | p1       | (T)11        | 11   | 120467 | 120477 |
| <i>Aspidistra nankunshanensis</i> | 59      | p1       | (A)10        | 10   | 122432 | 122441 |
| <i>Aspidistra nankunshanensis</i> | 60      | p3       | (ATT)4       | 12   | 125192 | 125203 |
| <i>Aspidistra nankunshanensis</i> | 61      | p1       | (T)10        | 10   | 126330 | 126339 |
| <i>Aspidistra nankunshanensis</i> | 62      | p1       | (A)10        | 10   | 128764 | 128773 |

| <b>ID</b>                         | <b>SSR nr.</b> | <b>SSR type</b> | <b>SSR</b> | <b>size</b> | <b>start</b> | <b>end</b> |
|-----------------------------------|----------------|-----------------|------------|-------------|--------------|------------|
| <i>Aspidistra nankunshanensis</i> | 63             | p5              | (TTTCG)3   | 15          | 131942       | 131956     |
| <i>Aspidistra nankunshanensis</i> | 64             | p4              | (CATT)3    | 12          | 135828       | 135839     |
| <i>Aspidistra nankunshanensis</i> | 65             | p1              | (A)10      | 10          | 140184       | 140193     |
| <i>Aspidistra nankunshanensis</i> | 66             | p2              | (TC)5      | 10          | 150665       | 150674     |

Note: Two adjacent SSRs separated by less than 20 bp are present in compound formation.
